1 **Title**

2 Investigation of vitamin B<sub>12</sub> concentrations and tissue distributions in larval and adult Pacific oysters  
3 and related bivalves

4

5 **Authors**

6 Susanne Vogeler<sup>1</sup>, Gary H. Wikfors<sup>2</sup>, Xiaoxu Li<sup>3</sup>, Justine Sauvage<sup>1</sup>, Alyssa Joyce<sup>1\*</sup>

7

8 **Affiliations**

9 <sup>1</sup> Department of Marine Science, University of Gothenburg, Carl Skottbergsgata 22B, 41319  
10 Gothenburg, Sweden

11 <sup>2</sup> NOAA Fisheries Service (NMFS) Northeast Fisheries Science Center, Milford, CT 06460, USA

12 <sup>3</sup> South Australia Research and Development Institute Aquatic Sciences Centre, 2 Hamra Ave, West  
13 Beach, SA 5024, Australia

14

15 \* Corresponding author: Alyssa Joyce, [alyssa.joyce@gu.se](mailto:alyssa.joyce@gu.se), +46 317869653

16

17 **Authors' contribution**

18 Experimental design and conceptualization were generated by SV, AJ, JS & XL. All laboratory  
19 studies and experiments were completed by SV & JS. Manuscript preparation and interpretation of  
20 data were conducted by SV, AJ, GHW, and all authors have read and approved the final manuscript.

21

22 **Keywords**

23 Vitamin B<sub>12</sub>, cobalamin, bivalves, algae, Pacific oyster, scallop, cockle

24

25 **Abstract**

26 Vitamin B<sub>12</sub> (B<sub>12</sub>) is an essential micronutrient for all animals, but is not present in plants and is  
27 produced *de novo* only by bacteria or archaea. Accordingly, humans must derive required B<sub>12</sub> from  
28 eating animal products or vitamin supplements, as deficiencies can lead to severe health issues including  
29 neuropathy. An often overlooked source in the human diet of B<sub>12</sub> is shellfish, in particular bivalves,  
30 which have significantly higher levels of B<sub>12</sub> than other animal sources, including all vertebrate meats.  
31 Origins and key metabolic processes involving B<sub>12</sub> in bivalves remain largely unknown, despite the  
32 exceptionally high levels. In this study, we examined in several Australian bivalve species, hypotheses  
33 concerning B<sub>12</sub> utilisation and uptake through diet or microorganism symbiosis. Vitamin B<sub>12</sub> is not  
34 distributed evenly across different tissues types of the Pacific oyster, the commercial scallop and  
35 Goolwa cockle (pipi), with higher accumulation in the oyster adductor muscle and gill, and mantle and  
36 siphons of the Goolwa cockle. Oyster larvae before first feeding already contained high amount of B<sub>12</sub>;  
37 however, a significant decrease in B<sub>12</sub> concentration post metamorphosis indicates a higher utilisation  
38 of B<sub>12</sub> during this life event. We demonstrated that microalgal feed can be supplemented with B<sub>12</sub>,  
39 resulting in an enriched feed, but this did not result in an increase in larval B<sub>12</sub> concentrations when  
40 oyster larvae were fed with this diet relative to controls, thus supporting the theory that a B<sub>12</sub> producing  
41 microbiome within bivalves was the potential source of B<sub>12</sub> rather than feed. However, B<sub>12</sub>  
42 concentrations in the digestive tract of adult oysters were low compared to other tissue types, which  
43 might challenge this theory, at least in adults. Our findings provide insight into B<sub>12</sub> uptake and function  
44 in bivalve species, which will aid the promotion of bivalves as suitable B<sub>12</sub> source for humans as well  
45 as provide crucial information to the aquaculture industry in relation to optimisation of vitamin  
46 supplementation in bivalve hatchery production.

47

48

49

## 50 **Introduction**

51 Vitamin B<sub>12</sub> (B<sub>12</sub>), or cobalamin, is an essential vitamin for metazoan species that is required in key  
52 metabolic processes such as DNA synthesis and fatty acid and amino acid metabolism, as well as  
53 playing a functional role in the nervous system (1). Deficiency in B<sub>12</sub>, can cause serious health  
54 conditions in humans, including pernicious anaemia, peripheral neuropathy, and other neurological  
55 complications (1, 2). Vitamin B<sub>12</sub> is produced *de novo* in prokaryotes - bacteria and archaea - using  
56 aerobic and anaerobic pathways, but no eukaryotes are known to produce this essential vitamin (3-5).  
57 In humans, dietary sources of B<sub>12</sub> include animal products such as meat and dairy (1, 6) (recommended  
58 for adults approx. 2.4 µg per day (7)). All carnivores and omnivores must acquire B<sub>12</sub> from the diet as  
59 they have lost cellular synthesis pathways; however, some herbivores have symbiotic relationships with  
60 bacteria inhabiting the digestive tract, e.g., ruminants such as cattle, that produce B<sub>12</sub> *in situ* (8).

61 A widely underappreciated source for B<sub>12</sub> for humans is shellfish. Bivalves such as clams and oysters  
62 are known to have considerably higher B<sub>12</sub> concentrations than meat, and therefore provide an excellent  
63 natural food-based source of B<sub>12</sub>. Concentrations of B<sub>12</sub> in bivalves range from 15 µg/100g to 96  
64 µg/100g (9-13), which is much higher than in commonly consumed animal products, such as beef (0.7-  
65 5.2 µg/100g), pork (0.4-2.0 µg/100g), and chicken (0.2-0.6 µg/100g) (6).

66 The reason for such high B<sub>12</sub> concentrations in shellfish is unknown. In humans and many vertebrates,  
67 B<sub>12</sub> is involved in a wide variety of metabolic functions, including in the circulatory and nervous  
68 systems, thus it is surprising that shellfish have such high levels given they have neither red blood cells  
69 nor a complex nervous system. Furthermore, it is unclear how bivalves obtain such high B<sub>12</sub>  
70 concentrations as bivalves cannot produce B<sub>12</sub>- only prokaryotes can - thus they must acquire it either  
71 through their diet by feeding on microalgae or bacteria that contain it, obtaining the vitamin from  
72 microorganisms from their microbiome or by assimilating dissolved B<sub>12</sub>.

73 Approximately half of the eukaryotic microalgae are dependent on exogenous B<sub>12</sub> sources (B<sub>12</sub>  
74 auxotrophs) (14); these most often are thought to obtain B<sub>12</sub> through symbiotic relationships with  
75 heterotrophic bacteria (15-19). Algal strains, which are commonly grown for aquaculture diets, such as

76 *Tetraselmis* spp., *Pavlova* spp. and *Isochrysis* spp., contain approximately 180 µg/100g up to  
77 approximately 700 µg/100g B<sub>12</sub> dry weight (20, 21), thus providing an adequate source for B<sub>12</sub> for  
78 bivalves. Bivalves might also assimilate B<sub>12</sub> from ingested bacteria that are part of their feed, even  
79 though algae are considered their primary feed source.

80 Alternatively, bivalves might also assimilate B<sub>12</sub> from microorganism in their gut similar to other  
81 animals such as terrestrial ruminants (e.g., cattle, sheep) that possess a B<sub>12</sub> producing microbiome. Such  
82 relationships may be particularly important in early larval stages when bivalve larvae first acquire a gut  
83 microbiome by ingesting microorganisms from the environment (22).

84 Although it is possible that bivalves can assimilate dissolved B<sub>12</sub> directly from seawater, the high  
85 quantities in tissue make it seem improbable that this is the primary source. Dissolved B<sub>12</sub> in seawater  
86 is naturally very low, for example, ranging from 0.2-990 pM (23) or 3-605 ng/L in coastal areas of the  
87 Northern and Southern Atlantic Ocean (24). Nevertheless, understanding which of these pathways –  
88 feed, microbiome, or dissolved vitamins – is responsible for the high concentrations of B<sub>12</sub> in bivalve  
89 species could have practical implications for optimization of rearing conditions to ensure optimal  
90 bioavailability of this key nutrient in hatchery production. More globally however, insights into B<sub>12</sub>  
91 levels in different bivalve species may also lead to a better scientific understanding of the role of this  
92 vitamin, including its production, uptake and metabolism. A focus on the high levels of B<sub>12</sub> in bivalves  
93 may also help to promote their health benefits when marketing shellfish products.

94 Vitamin B<sub>12</sub> deficiency is of concern in human medicine where inadequate intake and malabsorption  
95 (9, 25) lead to B<sub>12</sub> deficiencies, even in countries with adequate access to animal-sourced protein.  
96 Studies have shown that B<sub>12</sub> deficiency occurs in a wide range of age groups, but can be particularly  
97 important in children, women of reproductive age, and the elderly (9, 26, 27). The most ubiquitous B<sub>12</sub>  
98 available from natural sources are adenosylcobalamin (AdCbl), methylcobalamin (MeCbl) and  
99 hydroxocobalamin (OHCbl) (28). AdCbl and MeCbl are biologically active forms of B<sub>12</sub>, but OHCbl  
100 and the industrially-produced cyanocobalamin (CnCbl), which is the form commonly used in nutritional  
101 supplements, have to be metabolized to be used by humans (28, 29). Indeed, food fortification and  
102 supplementation with MeCbl or synthesized CnCbl can aid against the emerging B<sub>12</sub> deficiencies;

103 however, recent investigations have challenged the suitability of B<sub>12</sub> supplements in relation to how  
104 well humans are able to uptake specific types of synthetic B<sub>12</sub> (CnCbl), as well as absorption limitations  
105 and genetic conditions that interfere with vitamin B<sub>12</sub> assimilations (30). For these reasons, natural  
106 sources of B<sub>12</sub> such as occur in shellfish are considered preferable to supplements.

107 No theory has been advanced as to why bivalves have such high levels of B<sub>12</sub>. Molluscs including most  
108 bivalve species have significantly higher levels of B<sub>12</sub> than other phyla of marine invertebrates (31) and  
109 much higher B<sub>12</sub> levels than fish or terrestrial livestock animals. In an attempt to answer why, in this  
110 study, we explored B<sub>12</sub> distribution in several adult bivalve species and investigated B<sub>12</sub> assimilation  
111 during different developmental stages of oysters. We experimentally varied B<sub>12</sub> during oyster larval  
112 development and assessed whether or not high B<sub>12</sub> diets (delivered as B<sub>12</sub>-enriched microalgae) affected  
113 the B<sub>12</sub> concentrations in larvae. We also examine the B<sub>12</sub> concentrations in species of microalgae  
114 commonly used in the aquaculture industry when grown in differently B<sub>12</sub>-enriched growth media in  
115 order to assess the effects of different B<sub>12</sub> levels in feeds. Information derived from these experiments  
116 provides a preliminary overview of the utilisation and distribution of this key vitamin.

117

118

## 119 **Materials and Methods**

120 Algal cultivation and larval experiments were carried out at the South Australian Research and  
121 Development Institute (SARDI) in Adelaide, Australia.

122

### 123 *Vitamin B<sub>12</sub> in bivalve tissues*

124 Adult Pacific oysters, *Crassostrea gigas*, were obtained from Franklin Harbour, South Australia,  
125 including the parental generation for the spawned larvae that were utilised in subsequent larval  
126 experiments. From a local fishmonger, we purchased alive Goolwa cockles, *Plebidonax deltoides*  
127 ('pipis') also from South Australia, and commercial scallops *Pecten fumatus* (adductor muscle and roe)

128 sourced from Victoria, Australia. The oyster samples were sexed prior to dissection, and the following  
129 tissue types were sampled from three males and three females: mantle (one side), gills (one side),  
130 posterior adductor muscle, gonad and digestive tract (digestive gland, stomach, midgut, intestine). The  
131 adductor muscles from commercial scallops, with roe attached, were dissected after defrosting. The  
132 tissue of a single (logistical limitations) female Goolwa cockle was also dissected: foot, adductor  
133 muscle, gonads (eggs), digestive tract and remaining parts (gills, mantle and siphons). Each tissue  
134 sample was rinsed in fresh tap water to remove debris, homogenised using a hand blender, and stored  
135 at -80°C for B<sub>12</sub> analysis. Weight of sampled tissues ranged from 0.399 g to 1.434 g wet weight,  
136 depending upon tissue type (S1 File)

137

### 138 Algal feed cultivation

139 Four species of microalgae, commonly used in bivalve hatcheries and known to be B<sub>12</sub>-dependent, were  
140 used in the feeding experiments: *Tisochrysis lutea* (*T-iso*), *Pavlova lutheri*, *Chaetoceros muelleri*, and  
141 *Chaetoceros calcitrans* (19, 32). All species were grown separately in UV-treated, 0.04-µm-filtered  
142 seawater (38 ppt, pH 8.2) and provided with 24 h light and aeration with additional CO<sub>2</sub>. Algae were  
143 cultivated in different types of media (S2 File): (1) f/2 medium (33) with a final low B<sub>12</sub> concentration  
144 of 3.69x10<sup>-10</sup> M (1xB<sub>12</sub>), (2) f/2 with a final high B<sub>12</sub> concentration of 3.69x10<sup>-9</sup> M (10xB<sub>12</sub>), or (3)  
145 Walne medium (34) with a final B<sub>12</sub> concentration of 7.38x10<sup>-9</sup> M (20xB<sub>12</sub>). Microalgae grown in f/2  
146 media were cultured under static conditions in 10-L carboys. Stock solutions for essential vitamins B<sub>12</sub>,  
147 thiamine (B<sub>1</sub>), and biotin (formerly vitamin H, now B<sub>7</sub>) were prepared in 0.2-µm-filtered seawater and  
148 added to the f/2 media after autoclaving. Microalgae grown in Walne medium were cultivated by the  
149 SARDI hatchery staff with *T. lutea*, *P. lutheri* and *C. muelleri* maintained separately in 50-L, semi-  
150 continuous culture bag systems. The final Walne medium for the bag system was heated to 80°C for  
151 pasteurization and cooled before being added to the algal cultures. *C. calcitrans* cultures grown in  
152 Walne medium were cultivated in 10-L carboys with the final media autoclaved before use.

153 Algal species grown in 1xB<sub>12</sub> f/2 medium or 10xB<sub>12</sub> f/2 medium, as well as in Walne medium (20xB<sub>12</sub>)  
154 were sampled for B<sub>12</sub> analysis from three different carboys or bags per species/medium. One additional  
155 sample for algae grown in the Walne medium (continuous bag culture) was taken each for *T. lutea* and  
156 *P. lutheri*. Approximately 1 L to 1.5 L per carboy or bag of each algal culture was harvested and  
157 centrifuged at 1,960 g for 2 min to pellet the algae. Carboys were sampled at a density of 5.1x10<sup>6</sup> –  
158 1.5x10<sup>7</sup> cells/ml; whereas, bags at exponential growth phase were sampled by hatchery staff. After  
159 centrifugation, 50 mL of the original supernatant for each algal sample was collected for analysis. Algal  
160 pellets were resuspended in 50 mL fresh seawater as an additional washing step, then centrifuged again  
161 (the second supernatant was discarded). The algae pellets and media samples were stored at -80°C. For  
162 the B<sub>12</sub> analysis, all algal samples were freeze dried and stored at -80°C. Dried larval pellets weight  
163 ranged from 0.041 g to 0.198 g (S1 File).

164 Additional media samples were collected from fresh 1xB<sub>12</sub> f/2 medium, 10xB<sub>12</sub> f/2 medium, autoclaved  
165 Walne medium, non-autoclaved Walne medium, and pasteurized (80°C) Walne medium from the bag  
166 system. For each media type, three 50 mL samples were taken and frozen at -80°C for further analysis.

167

### 168 Feeding experiments

169 Pacific oyster, *C. gigas*, larvae were derived from fourteen family lines of broodstock originating from  
170 Franklin Harbour in South Australia. Larvae were fed the first time 24 hours post fertilisation (hpf),  
171 when larvae had reached D-shelled larval stage, with daily feedings thereafter with microalgae grown  
172 either in 1xB<sub>12</sub> f/2 medium, 10xB<sub>12</sub> f/2 medium or Walne medium. The first 7 days post fertilisation  
173 (dpf), oyster larvae were fed with a microalgal mix consisting of *T. lutea*, *P. lutheri* and *C. calcitrans*.  
174 Both, *T. lutea* and *P. lutheri*, were given at equal ratios and the feed density was increased gradually  
175 each day from 30,000 cells/mL to 50,000 cells/mL, while *C. calcitrans* was fed at a constant volume  
176 corresponding to 20,000 cells/ml. From the eighth day onwards, *C. muelleri* was added to the feed  
177 mixture when larvae reached a shell size at which this species is known to be ingested. The mixture  
178 then consisted of 30% *T. lutea*, 30% *P. lutheri*, and 40% *C. muelleri*. The feed density was increased

179 each day until 14 dpf to 80,000 cells/mL and kept constant until end of the experiments, while *C.*  
180 *calcitrans* was given at a constant volume corresponding to 20,000 cells/ml.

181

### 182 *Low and high vitamin B<sub>12</sub> diets during larvae development*

183 Prior the first feeding, 24 hpf D-shelled larvae were placed in 20-L conical tanks and reared under static  
184 conditions with gently-aerated, UV-treated, 1- $\mu$ m-filtered seawater (38 ppt, pH 8.2). The starting  
185 stocking density was 8-10 larvae/mL, which was gradually reduced to <1 larva/mL at the end of the  
186 experiment as larvae were sampled and graded. The experiment was carried out for 21 dpf until larvae  
187 reached the late-veliger stage. All larvae were fed daily with an algal mixture grown either in 1xB<sub>12</sub> f/2  
188 or 10xB<sub>12</sub> f/2 after each tank was cleaned and refilled with new seawater. Four individual tanks as  
189 biological replicates were maintained per algae treatment.

190 Over the course of the experiment, larval density and size were monitored every 2-4 days and assessed  
191 under an inverted microscope. After the experiment was terminated, larvae were washed and kept in  
192 seawater without feed for 6 h (depuration). Larvae were then sampled (10,000-20,000 larvae; ~88-170  
193 mg from all tanks, except for one 10xB<sub>12</sub> f/2 tank with ~5,000 larvae (0.016 g)) that were retained  
194 through settlement and sampled as spat; in all cases, final size and density were assessed. All larval  
195 samples were centrifuged at 1960 g for 3 min to remove remaining seawater and kept at -80°C until  
196 further analysis. Three samples were taken at the beginning of the experiment of unfed, 24-hpe, D-  
197 shelled larvae, centrifuged as the other samples, and stored at -80°C. Before larval samples were sent  
198 for analysis, each sample was homogenised using a hand blender and re-frozen. Temperature of one 20-  
199 L tank was assessed continuously over 3 days from 15 dpf to 18 dpf using a temperature sensor.

200

### 201 *Vitamin B<sub>12</sub> assessment during larval development*

202 To assess the B<sub>12</sub> concentration throughout development, a second larval experiment was conducted  
203 simultaneously using larvae from the same fertilisation event as the feeding experiment. Larvae were



204 reared under the same conditions, but to obtain the larger required volumes for sub-sampling at different  
205 developmental stages, larvae in this treatment were instead reared in one 200-L tank under static  
206 conditions instead of as replicates of specific treatments in the 20-L tanks. Larvae were fed daily with  
207 an algae mixture grown in Walne medium (20x B<sub>12</sub>) as outlined above. Larvae were sampled at different  
208 developmental stages, including late D-shelled larvae (3 dpf), early veliger (5 dpf), mid-veliger (10  
209 dpf), late veliger/early pediveliger (15 dpf, before eye-spot developed), and at eyed pediveliger larvae  
210 (19 dpf). Larvae displayed the typical behaviour of competence for metamorphosis, including  
211 prominent eye-spot, sinking to the bottom, reduced velum, and crawling behaviour (extending the foot)  
212 after 19 dpf. Metamorphosis was chemically induced with epinephrine hydrochloride (Sigma-Aldrich)  
213 at 10<sup>-4</sup> M for 1 h (35), and once set, were washed and kept in seawater with algal feed. Spat (21 dpf)  
214 were collected and sampled two days post metamorphosis. Both larvae and spat were sampled in  
215 triplicates representing three technical replicates and were prepared and stored as described above.  
216 Weights of all larval samples were recorded (S1 File). After completion of the experiment, the 200-L  
217 tank was filled with seawater and temperature was measured continuously over two days using a  
218 temperature sensor.

219

#### 220 Analysis of vitamin B<sub>12</sub>

221 The B<sub>12</sub> analysis was conducted by Eurofins Vitamin Testing Denmark, which is an accredited food lab  
222 for B<sub>12</sub> testing using the *Lactobacillus leichmanii* (ATCC 7830) microbiological assay (Reference  
223 method: AOAC 952.20). Using this method, B<sub>12</sub> is extracted from the samples in an autoclave using a  
224 buffered solution and then diluted in basal medium. The growth response of *L. leichmanii* to extracted  
225 B<sub>12</sub> is measured turbidimetrically, which is then compared to calibration solutions with known CnCbI.  
226 The limit of detection for this assay is indicated as 0.01 µg/100g.

227

#### 228 Statistical analysis

229 Total B<sub>12</sub> concentrations for whole oysters were calculated based upon the B<sub>12</sub> concentrations of each  
230 tissue type corrected for the proportion of the total weight. Whole oysters were calculated based upon  
231 sampled tissue types (excluding labial palps, heart and connecting tissue, as these were not sampled).  
232 Statistical difference between B<sub>12</sub> concentrations of algae, larvae, and tissue samples were calculated  
233 using a Student's T test for equal or unequal variance detected by an F-Test for Variance or a Kustal-  
234 Walis H test followed by pairwise comparison using Dunnett's T3 method to trimmed means (36).

235

236

## 237 **Results**

### 238 Vitamin B<sub>12</sub> in adult tissues

239 Vitamin B<sub>12</sub> concentrations in five different tissue types -- mantle, gills, digestive tract, adductor  
240 muscle, and gonads (eggs/sperm) -- of six *C. gigas* individuals, separated by sex (three males and three  
241 females), were assessed (Fig. 1). The B<sub>12</sub> concentrations of the gill sample of male 1 and the digestive  
242 tract and sperm samples of male 3 could not be quantified by the *L. leichmanii* assay (ATCC 7830)  
243 conducted by Eurofins and are therefore missing (Fig. 1A). Overall, no significant differences were  
244 found between tissue types from male and female individuals; thus mantle, gills, digestive tract and  
245 adductor muscle samples of males and females were pooled for statistical analysis (Fig. 1B).

246 On average, adductor muscle samples contained the highest amount of B<sub>12</sub> with 63.4±7.7 µg/100g, a  
247 significantly higher concentration compared to mantle tissue with 35.5±4.7 µg/100g, gills with 39.0  
248 ±2.5 µg/100g, and female gonads (unfertilised eggs) with 26.5±7.1 µg/100g. The lowest B<sub>12</sub>  
249 concentrations were recorded in male gonads (sperm) with 18.0±2.0 µg/100g and the digestive tract  
250 with 12.7±2.0 µg/100g. The total B<sub>12</sub> concentration for each individual, as a mean of the concentrations  
251 in each tissue type in relation to their proportion of total weight, ranged from 28.0 µg/100g to 40.7  
252 µg/100g for the three females and male 2.

253 In contrast to *C. gigas*, the commercial scallop *P. fumatus* contained significantly lower B<sub>12</sub> levels  
254 (p<0.01) in the adductor muscle with 4.1±0.4 µg/100g. The scallop individuals were bought frozen, and  
255 although we cannot exclude that the freezing and storage process might have modified the final B<sub>12</sub>  
256 concentration, single freezing cycles are not noted in literature to affect the final B<sub>12</sub> concentrations in  
257 seawater, blood serum, or fish (37-39). The mean B<sub>12</sub> concentration in scallop roe, 9.2±0.9 µg/100g,  
258 was not significantly different (p>0.05) from unfertilised oyster eggs.

259 A single female Goolwa cockle, *P. deloides*, individual was also dissected and analysed, which provided  
260 a very different distribution of B<sub>12</sub> in the tissues, with the highest concentrations measured in the  
261 remaining parts including the gills, mantle and the siphons (322.0±96.6 µg/100g) followed by the  
262 digestive tract with 67.5±20.3 µg/100g, foot with 60.8±18.2 µg/100g, and gonads/eggs with 47.5±14.3  
263 µg/100g. The lowest concentration was in the adductor muscle at 35.9±10.7 µg/100g.

264

265 **Fig. 1: Vitamin B<sub>12</sub> (µg/100g) concentrations in different tissue types of bivalves.**

266 **A)** B<sub>12</sub> concentration in three female and three male Pacific oyster (*Crassostrea gigas*) individuals, three female  
267 commercial scallop (*Pecten fumatus*) individuals and a single female Goolwa cockle ('pipis'; *Plebidonax*  
268 *deltoides*). n.a.: not analysable. Total: total B<sub>12</sub> concentration corrected for wet weight of tissue to total weight. **B)**  
269 Average B<sub>12</sub> concentration (filled circles) of pooled male and female oyster individuals (open circles) per tissues  
270 type. Error bars for average concentration: standard error; letters above show significant differences (p<0.05).

271

272

### 273 Vitamin B<sub>12</sub> in algae

274 The four algal species all contained B<sub>12</sub> when grown in 1xB<sub>12</sub> f/2 (Fig. 2A): *C. muelleri* 98.0 ±1.0  
275 µg/100g > *T. lutea* 71.0 ±2.3 µg/100g > *C. calcitrans* 49.1 ±1.6 µg/100g > *P. lutheri* 38.7 ±1.3 µg/100.  
276 Increasing B<sub>12</sub> concentrations in the media led to significant increases in B<sub>12</sub> concentration in all algal  
277 cultures, with concentrations for algae grown in 10xB<sub>12</sub> f/2 medium as follows: *T. lutea* 811.0 ±29.8  
278 µg/100 > *P. lutheri* 249.7 ±6.9 µg/100g > *C. muelleri* 202.0 ±4.4 µg/100g > *C. calcitrans* 184.3 ±6.4  
279 µg/100g. When compared to algae grown in the continuous bag cultures in Walne medium, only *P.*

280 *lutheri* showed a significant increase of B<sub>12</sub> concentrations with 604.0±136.4 µg/100g; the *T. lutea* bag  
281 cultures with 756.5 ±190.2 µg/100g and *C. muelleri* with 301.0 ±49.0 µg/100g were not significantly  
282 different from carboys with 10xB<sub>12</sub> f/2. In contrast to the carboy-cultured algae, however, the algae  
283 grown in the bag system displayed large variance between individual samples likely resulting from  
284 variation in the growth phase of each culture (concentration of algae in the bag systems varied). As  
285 algae in the bag bioreactors were continuous, thus in exponential phase at all times, the B<sub>12</sub>  
286 concentration in each sample varied based upon the concentration of algae in the bag at the time of  
287 sampling. Analysis of the supernatant in the algal cultures, however, did not show high variance  
288 between samples for *T. lutea*, *P. lutheri* and *C. muelleri* (Fig. 2B). It needs to be noted that two of the  
289 *T. lutea* and *P. lutheri* media samples could not be analysed using the microbiological assay as a  
290 consequence of a handling error (Eurofins). In general, media samples for each algal sample displayed  
291 a similar pattern in B<sub>12</sub> concentrations with lower concentrations for 1xB<sub>12</sub> f/2 medium and significantly  
292 higher concentrations in 10xB<sub>12</sub> f/2 medium, except for *C. muelleri*. Interestingly, the media in the three  
293 bag-grown algal species -- *T. lutea*, *P. lutheri* and *C. muelleri* -- display significantly higher B<sub>12</sub>  
294 concentration than 10xB<sub>12</sub> f/2 samples, suggesting that the continuous inflow of media in the hatchery  
295 bag system led to accumulation of B<sub>12</sub>. Alternatively, it is possible that a general higher starting  
296 concentration was delivered in the media supplying the bags as a result of a preference by the hatchery  
297 staff for high levels of vitamins and trace minerals in the stock solutions (to counteract unknown effects  
298 of pasteurisation). This was confirmed by analysing Walne medium in unused bags (Fig. 2C), which  
299 showed significantly higher B<sub>12</sub> concentrations compared to the unautoclaved Walne medium that was  
300 prepared following a standard protocol (S2 File).

301 Compared to the other three algal species, *C. calcitrans*, which was cultured exclusively in carboys  
302 (batch cultures) rather than the continuous culture bags, displayed a divergent pattern of B<sub>12</sub> distribution.  
303 Although the B<sub>12</sub> concentrations in algae from 10xB<sub>12</sub> f/2 were significantly higher than from 1xB<sub>12</sub> f/2,  
304 the cultures grown in Walne medium were significantly lower with 69.2 ±1.6 µg/100g (Fig. 2A). This  
305 was also observed in the media supernatant for *C. calcitrans* cultures (Fig. 2B). The carboys with Walne  
306 enrichment were autoclaved before algae were added, a practice that is often followed in hatcheries. As

307 we believed the autoclaving to be damaging to the vitamins, we also assessed autoclaved and non-  
308 autoclaved Walne media (Fig. 2C). Our results confirm that autoclaving media does indeed significantly  
309 reduce B<sub>12</sub> concentrations, and that autoclaving as standard hatchery protocol to prepare sterile media  
310 can significantly destroy vitamins such as B<sub>12</sub>.

311

312 **Fig. 2: Vitamin B<sub>12</sub> (µg/100g) concentrations of microalgal species.**

313 **A)** Average B<sub>12</sub> concentration in the four microalgal species (*Tisochrysis lutea*, *Pavlova lutheri*, *Chaetoceros*  
314 *muelleri* and *Chaetoceros calcitrans*; freeze-dried) grown in 1xB<sub>12</sub> f/2, 10xB<sub>12</sub> f/2 and Walne media (20xB<sub>12</sub>) and  
315 **B)** of the media supernatant of the four algal species. Algae grown in 1xB<sub>12</sub> f/2 and 10xB<sub>12</sub> f/2 media as well as  
316 *C. calcitrans* Walne medium were cultivated in 10-L carboys, while the remaining algal species grown in Walne  
317 medium were cultivated in a bag system. **C)** B<sub>12</sub> concentration of fresh growth media for each medium type. Open  
318 circles: individual measurements, filled circles: average of all measurement for this sample point including  
319 standard error (error bars), letters above show significant differences (p<0.05).

320

321

322 *Vitamin B<sub>12</sub> in oyster larvae*

323 Vitamin B<sub>12</sub> concentrations were assessed during oyster larval development and after feeding with algae  
324 grown in media with different B<sub>12</sub> concentrations. Larvae at 24 hpf, which were unfed and used for  
325 larval feeding experiments, contained a mean B<sub>12</sub> concentration of 50.0 ±3.0 µg/100g (Fig. 3A).  
326 Throughout development, to the end of larval phase (eyed pediveligers), the B<sub>12</sub> concentrations did not  
327 significantly change for larvae fed with algae grown in Walne medium. After metamorphosis, however,  
328 mean B<sub>12</sub> concentration decreased significantly in two-day old spat (21 dpf) to 28.1 ±2.3 µg/100g. The  
329 temperature in the 200-L tank varied from 24.40°C to 26.15°C, with an average of 25.38±0.03°C. Larvae  
330 reached eyed pediveliger stage and were close to metamorphosis after 19 dpf, with an average size of  
331 317.0±2.3 µm (Fig. 3B).

332 Larvae reared in smaller tanks of 20-L volume fed with algae grown in f/2 (1xB<sub>12</sub> & 10xB<sub>12</sub>) grew  
333 significantly slower and did not reach eyed pediveliger stage (Fig. 3B). As there was no significant

334 difference in larval growth between the two B<sub>12</sub> algal treatments, experiments were terminated when  
335 larvae were at late veliger stage (20 dpf, but no predominant foot visible) and reached an average size  
336 of 229.8±2.3 µm for larvae fed with 1xB<sub>12</sub> f/2 algae, and 217.6±2.8 µm for larvae fed with 10xB<sub>12</sub> f/2  
337 algae. The temperatures in the smaller tanks were lower than the 200-L tank, with an average of  
338 23.30±0.03°C ranging from 22.6°C at night to 25.9°C during the day.

339 Different B<sub>12</sub> concentrations in algal feed did not significantly change the B<sub>12</sub> concentration of oyster  
340 larvae (Fig. 3C). Larvae fed with algae grown in f/2 with different B<sub>12</sub> concentrations did not  
341 significantly vary in their final average concentrations after 21 dpf with 1xB<sub>12</sub> f/2 larvae containing  
342 63.2±5.8 µg/100g and 10xB<sub>12</sub> f/2 larvae of 88.8±20.30 µg/100g, although the observed trend indicates  
343 higher B<sub>12</sub> levels in the larvae fed with high B<sub>12</sub> algal feeds. When compared to late veliger (54.4±1.33  
344 µg/100g) and eyed pediveliger larvae (51.8±3.83 µg/100g) fed with algae grown in Walne medium,  
345 which contained the highest B<sub>12</sub> concentration of all algal feed, B<sub>12</sub> concentrations of 1xB<sub>12</sub> f/2 larvae  
346 and 10xB<sub>12</sub> f/2 larvae were not significantly different, suggesting that B<sub>12</sub> concentrations in algal feed  
347 does not affect the final B<sub>12</sub> concentration of larvae at late larval stage, or that the lowest algal B<sub>12</sub> ration  
348 was sufficient or in excess to provide for larval needs.

349

350 **Fig. 3: Vitamin B<sub>12</sub> (µg/100g) concentrations of Pacific oyster, *Crassostrea gigas*, larvae.**

351 **A)** Average B<sub>12</sub> concentrations at different larval live stages. Early D-shelled larvae 1 day post fertilisation (dpf)  
352 were assessed prior first feeding and thereafter fed with algal mixtures of algae grown in Walne medium. **B)**  
353 Average larval size (µm) during development from 1 day post fertilisation (dpf) until end of experiments with  
354 final size assessment on 19 dpf for larvae in one 200 L tank fed with algae grown in Walne medium and on 20  
355 dpf for larvae in each four separate 20-L tanks fed with algae grown in f/2 media (1xB<sub>12</sub> & 10xB<sub>12</sub>). **C)** B<sub>12</sub>  
356 concentrations of 21 dpf larvae fed with algae mix grown in f/2 medium and 15 dpf and 19 dpf larvae fed with  
357 algae mixture grown in Walne medium. Circles: individual measurements, filled circles: average of all  
358 measurement for this sample point including standard error (error bars), \*: significant different (p<0.05).

359

360

## 361 Discussion

362 Shellfish, such as bivalves, are an excellent natural source of bioavailable B<sub>12</sub> (10, 12, 13, 40, 41).  
363 Bivalves have higher B<sub>12</sub> concentrations than standard meat and dairy products (6) and greater  
364 bioavailable B<sub>12</sub> than other marine species analysed, such as abalone and herbivorous snails (11). Most  
365 prior studies have focused on vitamin concentrations in whole animals, with almost no information  
366 provided on how B<sub>12</sub> is distributed in the different tissue types in bivalve species.

367 The results presented show that in relation to the proportion of the total weight, Pacific oysters tested  
368 showed a comparable B<sub>12</sub> concentration (28-40.7 µg/100g) to whole oysters previously reported (15.1-  
369 46.3 µg/100g) (10, 12, 13). The results also indicate that most B<sub>12</sub> in Pacific oysters is stored in the  
370 adductor muscle, accounting for approximately 31-35% of total soft-tissue B<sub>12</sub>; whereas, the lowest  
371 concentration of B<sub>12</sub> was found in the digestive tract. This finding was surprising given that the digestive  
372 tract could be presumed to be the organ for intake and absorption of B<sub>12</sub>. Most vertebrates store B<sub>12</sub> in  
373 the liver; in invertebrates, the digestive gland/hepatopancreas is the analogue to the vertebrate liver. In  
374 shrimp, for instance, B<sub>12</sub> is assumed to be stored in the hepatopancreas (42). Thus, it would have been  
375 expected to find high levels of B<sub>12</sub> in the digestive organs of oysters, given that B<sub>12</sub> could have been  
376 contained either in the feed or produced by microbial sources in the gut. These findings are further  
377 confounded by the fact that oysters seem to be unique in their storage of B<sub>12</sub> in the adductor muscle, as  
378 the two other bivalve species analysed – scallops and Goolwa cockle – did not exhibit a similar pattern.  
379 Vitamin B<sub>12</sub> concentration in the scallop adductor muscle was significantly lower than that in oysters,  
380 with an average of 4.1±0.4 µg/100g. Previous work has reported a B<sub>12</sub> concentration of 13.4±1.0  
381 µg/100g for the whole body of the scallop species *Mizuhopecten yessoensis* (10) and substantially lower  
382 concentrations in adductor muscle at 1.1±0.2 µg/100g (11). Similar methods for B<sub>12</sub> detection were  
383 utilised in those studies, suggesting that the adductor muscle is not the key tissue for B<sub>12</sub> storage in  
384 scallops. The Goolwa cockle also does not appear to store the majority of its B<sub>12</sub> in the adductor muscle;  
385 the adductor muscle had the lowest B<sub>12</sub> concentrations amongst all tissues tested in this species.  
386 Although the digestive tract contained the second highest B<sub>12</sub> concentration, the majority (77% of  
387 whole-body weight) of B<sub>12</sub> was stored in the remaining cockle soft tissues, such as siphons, gills and



388 mantle tissue. Further research is needed to specify which of the remaining organs contribute to the  
389 overall very high B<sub>12</sub> concentrations observed in the cockle sampled, and reported elsewhere for a wide  
390 range of clam/cockle species. Other molluscan species, such as gastropods and edible marine snails,  
391 display much higher concentrations in their visceral tissue than in in the edible muscle tissue (11, 43).

392 The function of such high B<sub>12</sub> concentrations in bivalves and other molluscan species is speculative. In  
393 terrestrial animals, as well as fish, B<sub>12</sub> is required as a cofactor for two B<sub>12</sub>-dependent enzymes,  
394 methylmalonyl-CoA mutase (MCM) for conversion of methylmalonyl-CoA to succinyl-CoA in the  
395 mitochondria and methionine synthase (MetH), which catalyses the re-methylation of homocysteine to  
396 methionine, an essential amino acid (for review see (44)). Homologues of both B<sub>12</sub>-dependent enzymes  
397 are predicted in the genomes of the Pacific oyster *C. gigas* (protein GenBank ID: MCM  
398 (XP\_034309642) & MetH (XP\_034325685)) and the scallop *P. maximus* (protein GenBank ID: MCM  
399 (XP\_033762147) & MetH (XP\_033734273)), but it is unknown if B<sub>12</sub> in molluscs functions similarly  
400 to key functions in vertebrates, where it is known to be involved in the health of nervous tissue,  
401 particularly myelin synthesis (45) and erythropoiesis (46). In marine bivalves, and invertebrates  
402 generally, B<sub>12</sub> might fulfil other functions potentially involved in the immune system. Non-specific  
403 immune response, including haemocyte counts, improved at optimum B<sub>12</sub> concentrations in the juvenile  
404 Chinese mitten crab, *Eriocheir sinensis* (47). Many *Vibrio* spp. are thought to be B<sub>12</sub> scavengers (48);  
405 thus a mechanism to remove B<sub>12</sub> from the gut or gills may also help to control bacterial populations that  
406 are scavenging free B<sub>12</sub>. Vitamin B<sub>12</sub> is known to have a critical role as an antioxidant, and thus may  
407 also aid osmotic regulation, which is particularly important for an intertidal species that faces strong  
408 salinity fluctuations and long periods during which the shell must remain closed during tidal  
409 fluctuations. The high levels of B<sub>12</sub> in bivalve shellfish could therefore be hypothesised to play a role  
410 in oxidative stress responses by reducing homocysteine levels (49, 50).

411 Although plants do not generally require B<sub>12</sub>, as they contain an alternative B<sub>12</sub>-independent form of  
412 methionine synthase (MetE) (51), bioavailability of B<sub>12</sub> potentially leads to an increase in phenolic  
413 compounds that are able to protect plants against oxidative stress induced by salinity (52). Vitamin B<sub>12</sub>  
414 deficiency also leads to oxidative stress and memory impairment in annelids (53). High demand for



415 methionine production by MetH might also be a unique trait of shell producing animals such as bivalves,  
416 given that some bivalves such as pearl oysters contain unique proteins for biocalcification and shell  
417 production which are remarkably rich in methionine (54-56). Besides the unknown functions of B<sub>12</sub> in  
418 bivalves, how this crucial vitamin is derived – whether from algal feed or microbiome - has still not  
419 been confirmed.

420 Microalgal species such as *T. lutea*, *P. lutheri*, *C. muelleri* and *C. calcitrans*, commonly used in  
421 hatcheries as larval feed, are B<sub>12</sub>-dependent (19, 32) and thus high density algal cultures are always  
422 supplemented with B<sub>12</sub> in algal growth media. Haptophytes such as *T. lutea* contain only a MetH  
423 homologue (57), but *Chaetoceros* spp. also contain MetH, with some species additionally expressing  
424 MetE (58). *P. lutheri*, in addition to MetH, may be able to remodel pseudo-vitamin B<sub>12</sub> (59), a non-  
425 bioavailable form of B<sub>12</sub> for most eukaryotes that is produced by specific bacteria. In the absence of  
426 bacteria which produce B<sub>12</sub> - such a occurs in axenic algal cultures - microalgae can assimilate B<sub>12</sub> from  
427 the growth media (60, 61). Our results show that B<sub>12</sub> concentrations in these four microalgal species  
428 were significantly increased by providing elevated B<sub>12</sub> in the growth media. Algae grown in the bag  
429 system, however, showed a larger variability in B<sub>12</sub> concentrations compared to carboy-grown algal  
430 cultures, which we cannot fully explain, given we did not see similar variability in the corresponding  
431 media supernatants. The bag systems were continuously provided with enrichments, but were also being  
432 harvested continually as feed for hatchery production. Consequently, not all sampled bags would have  
433 been at similar densities, and drip rates of media and water may have varied slightly, thus influencing  
434 the final B<sub>12</sub> concentrations based on different levels of media and density of cultures. Whether or not  
435 there is differential B<sub>12</sub> uptake during different growth phases is not known, although B<sub>12</sub> has been  
436 shown to be variable in batch cultures in which uptake is highest in the exponential growth phase (57).  
437 Levels of B<sub>12</sub> observed in the diatom *C. calcitrans*, however, which was cultured only in carboys (it  
438 does not grow well in hatchery bag systems), demonstrated an important principle related to vitamins  
439 in growth media. The B<sub>12</sub> concentrations in Walne growth medium decreased significantly after  
440 autoclaving, resulting in decreased B<sub>12</sub> concentration in the algal cultures. Although not all hatcheries  
441 autoclave vitamins solutions, this practice is relatively common and is worthy of note, as the sharp drop

442 in the B<sub>12</sub> concentration after autoclaving was significant. The amounts stipulated in media formulations  
443 were designed to be in excess for this reason; however, it was not clear if this could nonetheless, reduce  
444 the growth rate of *C. calcitrans*, or have subsequent effects upon larval rearing. Previous research has  
445 shown that increased B<sub>12</sub> in f/2 growth medium does not result in increased algal growth rate, as long  
446 as minimum B<sub>12</sub> concentrations are being met (62).

447 When provided with B<sub>12</sub>-rich diets, Pacific oyster larvae do not deplete or significantly bioaccumulate  
448 B<sub>12</sub> throughout larval development. They appear to maintain similar levels of B<sub>12</sub> compared to the early  
449 D-shelled stage prior to first feeding, thus suggesting that larvae already start out with high B<sub>12</sub>  
450 concentrations derived from non-algal sources. Our hypothesis that differences in B<sub>12</sub> concentrations of  
451 algal feed might be reflected in B<sub>12</sub> levels in larvae, which would have supported a theory of uptake  
452 from dietary sources, was not confirmed in results we report here. Indeed, the B<sub>12</sub> provided appears to  
453 be adequate in all treatments, and while a weak trend toward higher B<sub>12</sub> concentrations in 10xB<sub>12</sub> f/2 is  
454 seen, the vitamin concentration did not significantly differ from either 15 dpf larvae (closest in size to  
455 f/2 larvae) or 19 dpf larvae (closest in age) fed with Walne-grown algae which contained the highest  
456 B<sub>12</sub> concentrations of all treatments, including the B<sub>12</sub> enriched f/2 medium. These results suggest that  
457 larvae are not obtaining their B<sub>12</sub> primarily from their microalgal feed. With the limited information on  
458 B<sub>12</sub> requirements in bivalve larvae available, however, any potential beneficial effect of B<sub>12</sub> uptake  
459 through diets might be inconsequential as the B<sub>12</sub> requirements of larvae might have been met by even  
460 the lowest B<sub>12</sub> diets tested. A further decrease in the B<sub>12</sub> concentration in algal feed could shed additional  
461 light on this question; however, a reduction of B<sub>12</sub> concentration in the growth media could also result  
462 in poorly performing algae with unpredictable effects upon larval performance (63).

463 Higher B<sub>12</sub> concentrations in the diet did not significantly increase larval growth rates, as seen for the  
464 two f/2 algal diets, suggesting that enriching algal feeds with B<sub>12</sub> alone does not provide an advantage  
465 to the aquaculture industry in relation to improving larval growth. Presuming that a minimum level of  
466 B<sub>12</sub> is available, additional B<sub>12</sub> did not appear to provide any visible benefit, although we did not perform  
467 stress or immune challenges to determine if there may, in fact, be benefits for larval survival under  
468 adverse conditions. A significant increase in larval growth rate was seen for larvae fed with Walne-

469 grown algae; however, this acceleration of larvae development may be a result of stable temperatures  
470 in the 200-L tank compared to the fluctuating lower temperatures in the smaller 20-L tanks (temperature  
471 was probably a more important predictor of development rates in bivalves than our treatments (64)).  
472 Walne and f/2 seawater enrichments not only vary in B<sub>12</sub> concentrations, but also in other essential  
473 nutrients such as nitrogen. Whether or not the Walne medium improved the quality of the algal diet and  
474 eventually benefited larval development was not tested in this study.

475 A significant decrease in B<sub>12</sub> concentration was recorded in spat after metamorphosis suggesting that  
476 stored B<sub>12</sub> in larvae was utilized during metamorphosis, or that heavier calcification of the shell  
477 increased individual mass relative to soft-tissue mass. The vitamin's metabolic function during this key  
478 life event is unknown. Given the known anti-oxidant properties of B<sub>12</sub>, as well its important role in  
479 neurogenesis in other animals, the depletion or dilution of B<sub>12</sub> reserves during metamorphosis is not  
480 surprising. Indeed, metamorphosis appears to be a key life stage wherein B<sub>12</sub> is important, thus  
481 suggesting that further work on larval B<sub>12</sub> reserves in relation to settlement could be a valuable  
482 investigation in relation to hatchery production. For instance, feeding spat for a short duration with a  
483 high B<sub>12</sub> diet after metamorphosis did not replenish the B<sub>12</sub> concentrations to levels observed before  
484 metamorphosis. A more in-depth assessment of larvae and spat prior, during, and post-metamorphosis  
485 with different B<sub>12</sub>-containing algal diets might provide further insight into B<sub>12</sub> sources for larvae and  
486 spat. We cannot, however, exclude that the decrease in the vitamin concentration in spat is a  
487 consequence of the higher shell to soft-tissue mass ratio in spat compared to larvae. Given that the B<sub>12</sub>  
488 analysis methods are accurate primarily on soft tissue, we cannot exclude this interpretation.

489 The source of B<sub>12</sub>, whether algal diet or microbial, remains elusive. Our results provide some evidence  
490 that B<sub>12</sub> is sourced from enrichments added to grow the microalgal diet, several other possible sources  
491 of B<sub>12</sub> are worthy of consideration in relation to our findings. For pre-feeding stages, nutrients including  
492 essential vitamins might be supplied by maternal egg reserves as previously observed in bivalves and  
493 other animals (65-68). Our data, however, indicate that B<sub>12</sub> concentrations in unfertilised eggs are  
494 significantly lower than those of unfed D-shelled larvae, suggesting that another source of B<sub>12</sub> than their  
495 egg reserves is also available to larvae. The trochophore life stage, a free-swimming larval stage prior

496 to shelled D-shaped bivalve larvae, has basic structures such as a mouth, digestive mass (anlagen of the  
497 stomach) and intestine, ingesting particles in surrounding water for filter feeding – thus potentially  
498 ingesting symbiotic bacteria that could provide B<sub>12</sub> to the host. Gut microbiome analysis of adult  
499 bivalves and whole *Crassostrea* spp. veliger larvae have revealed that the majority of microorganisms  
500 are *Protobacteria* (up to ~95% in larvae) and *Cyanobacteria* ((22) and the references herein (69, 70)).  
501 *Cyanobacteria* are known to produce pseudo-vitamin B<sub>12</sub>, the non- bioavailable form of B<sub>12</sub> for most  
502 eukaryotes (59, 71, 72), and are therefore not likely to contribute to bivalve B<sub>12</sub> uptake. Approximately  
503 45% of the *Proteobacteria*, however are predicted to be B<sub>12</sub> producers (73), in particular  $\alpha$ -  
504 *Proteobacteria* and  $\gamma$ -*Proteobacteria* are suggested as B<sub>12</sub> producers in marine environments (74-77),  
505 which are also abundantly present in the microbiota of late *C. gigas* larvae (up to ~65% in 16 dpf larvae)  
506 (70). Thus, various prospective B<sub>12</sub>-producing bacteria are potentially being consumed and digested or  
507 colonizing the gut of bivalves providing a stable source of B<sub>12</sub>. This is partially supported by a study in  
508 four gastropod species, which found that, of the 270 bacteria strains isolated from the gastrointestinal  
509 tract, 87% were B<sub>12</sub>-producing bacteria (78). These authors, however, concluded that only 6% of these  
510 bacteria showed high productivity compared to bacteria in surrounding seawater, and none of them were  
511 identified as dominant species. Nevertheless, recent studies have shown that microbiomes of oysters  
512 can vary throughout larval life (79), under stress conditions (high pH) (80), between hatcheries (81),  
513 and rearing locations (82), but larvae and adults usually contain a small core microbiome ((22) and the  
514 references herein, (82, 83), which potentially holds the answer to B<sub>12</sub>-producing bacteria symbionts. To  
515 shed light on this, further research on oyster larvae is needed, including research into the microbiota of  
516 trochophore larvae with a special focus on B<sub>12</sub>-producing species abundance. In addition, the  
517 microbiomes of fertilised eggs could also provide some insight into potential vertical or/and horizontal  
518 transfer of bacteria from egg to embryo as reported in fish species (84). Furthermore, detection and  
519 localisation of cobalamin binding intrinsic factor, a glycoprotein required for uptake of B<sub>12</sub> that is  
520 normally present in the gut of animals - and is predicted in *C. gigas* (GenBank: LOC105331555) - will  
521 shed further light on where within the organism the majority of B<sub>12</sub> uptake occurs for both larvae and  
522 adults.

523 In regards to juveniles (post metamorphosis) and adult bivalves, other potential microbiomes should  
524 also be considered as sources of B<sub>12</sub>. Gills are prone to host a variety of microorganisms, wherein  
525 previous research has shown that oyster gills can have higher bacterial diversity than the digestive gland,  
526 including a large variety of  $\alpha$ - and  $\gamma$ -*Proteobacteria* (85, 86). Symbiotic relationships between gill  
527 bacteria and their bivalve hosts have been well studied in the context, for instance, of chemosynthetic  
528 symbioses (87, 88), or the supply of digestion enzymes for celluloses and lignin (89, 90). Vitamin B<sub>12</sub>  
529 concentration in *C. gigas* gills were relatively high, as well as very high in the remaining parts including  
530 the gills of the Goolwa cockle, and could therefore indicate potential symbiosis in the gills with B<sub>12</sub>-  
531 providing bacteria, or a role of B<sub>12</sub> in the gills and mantle that deserves further exploration.

532

533

#### 534 **Conclusion**

535 Our data confirms previous results that the Pacific oyster and the commercial scallop tested contain  
536 high concentrations of B<sub>12</sub> with additional evidence that this is also the case for the Goolwa cockle, a  
537 species not previously assessed for its B<sub>12</sub> content. Thus, bivalves provide a reliable source of B<sub>12</sub> for  
538 humans, and can be particularly important in areas of the world where other animal proteins such as  
539 meat and dairy products are less available, or people want to reduce the consumption of domesticated  
540 farm animals as meat source because of ethical and environmental concerns. Our research, one of the  
541 first studies that assessed B<sub>12</sub> concentrations in different tissues across species, suggests that B<sub>12</sub>  
542 concentrations vary between both species and between tissues within species. Therefore, B<sub>12</sub> availability  
543 in shellfish foods might depend upon which species and which tissue is commonly consumed, for  
544 instance scallop adductor muscle - the part of the scallop that is most commonly eaten in both Asian  
545 and Western countries - will provide less B<sub>12</sub> than consuming a whole raw oyster.

546 The sources of such high levels of B<sub>12</sub> in bivalves are unknown, as are the metabolic processes that  
547 utilise or require them. Differences in B<sub>12</sub> tissue accumulation suggest differences in physiological  
548 functions for B<sub>12</sub> among different bivalve species. Further analysis of different tissue types in additional  
549 bivalve species will provide better insight into the possibility that differences in B<sub>12</sub> accumulation in

550 tissues are conserved across different families or habitats, and whether or not there are patterns in  
551 freshwater *versus* marine species, or based upon spatial habitat distribution, such as levels between  
552 bivalves in intertidal or sublittoral zones. Such information could provide better insight in the origin of  
553 B<sub>12</sub> in bivalve species, and the reason for such high levels of accumulation. Given that oysters are filter  
554 feeders ingesting a large variety of microorganisms and microalgae, we hypothesised that B<sub>12</sub>, which  
555 can only be produced *de novo* by bacteria, could be produced by the animal's own gut or gill  
556 microbiome, such is the case in terrestrial ruminants. Alternatively, it was possible that B<sub>12</sub> is ingested  
557 by filter feeding on bacteria contained in particulate matter, or by ingesting B<sub>12</sub>-rich microalgae, with  
558 B<sub>12</sub> assimilated into the algae through known bacteria-algae symbiosis. Our results from the feeding  
559 experiments, however, did not confirm an increase in B<sub>12</sub> concentration in oyster larvae when fed with  
560 B<sub>12</sub>-enriched algal feed, thus suggesting that algal diet might not be the main source of B<sub>12</sub> (at least  
561 when high amount of B<sub>12</sub> is provided). In addition, unfed D-shelled larvae already contained high  
562 amount of B<sub>12</sub>, thereby implying B<sub>12</sub> uptake was provided by symbiotic microorganisms potentially  
563 acquired during the early trochophore larval stage. However, B<sub>12</sub> concentrations in the digestive tract  
564 of adult oysters are one of the lowest of all oyster tissues, indicating that B<sub>12</sub> production of a potential  
565 gut microbiome might be low. Overall, we could not unambiguously reach a clear conclusion about the  
566 source of B<sub>12</sub> in oysters and our experience indicates that identifying the B<sub>12</sub> origin in oysters is not a  
567 simple task. Further investigations of core microbiome communities in the gut and other tissues such  
568 as gills in relation to known B<sub>12</sub>-producing bacteria, as well as experiments involving elimination of B<sub>12</sub>  
569 through use of B<sub>12</sub> inhibitors might shed more light on the question of the origin of the high levels of  
570 B<sub>12</sub> in bivalves. Our results provide valuable information in relation to basic oyster larvae physiology  
571 as well as aquaculture applications. Vitamin B<sub>12</sub> concentrations are stable throughout oyster larval  
572 development, but data suggested a high requirement of B<sub>12</sub> during metamorphosis. Understanding how  
573 B vitamins are assimilated and used metabolically is interesting, particularly in light of genetic disorders  
574 in humans that lead to deficiencies (e.g. pernicious anaemia). It is also important for livestock and  
575 finfish diets, where vitamin supplementation is common to optimize growth rates. Although shellfish  
576 diets in hatcheries are not currently supplemented with vitamins beyond what is provided to the algae  
577 in growth media, investigations such as this study are important to assess vitamin requirements of larvae

578 during hatchery production. We can conclude that although B<sub>12</sub> concentrations in microalgal cultures  
579 can be increased by supplementing growth media with additional B<sub>12</sub>, this does not necessarily lead to  
580 an increase in B<sub>12</sub> concentrations within larvae nor does it lead to faster growth. Whether B<sub>12</sub>  
581 supplementation however, might provide some health benefits to larvae based upon increased survival  
582 when challenged with pathogens, or whether it increases rates of metamorphosis still needs to be  
583 determined. Based on our results, we recommend caution when autoclaving as sterilisation of growth  
584 media after vitamins have been added as this clearly leads to a decrease in B<sub>12</sub> concentrations in  
585 microalgal cultures.

586

587

## 588 **Acknowledgments**

589 For help with rearing of Pacific oyster larvae, we would like to thank Mark Gluis, Dr Penny Ezzy-Miller  
590 and the hatchery team from SARDI.

591

## 592 **Supplementary Information**

593 **S1 File: Sample information, weight and B<sub>12</sub> concentrations**

594 **S2 File: Media composition**

595

596

## 597 **References**

- 598 1. Allen LH, Miller JW, De Groot L, Rosenberg IH, Smith AD, Refsum H, et al. Biomarkers of  
599 Nutrition for Development (BOND): vitamin B-12 review. *J Nutr.* 2018;148(suppl\_4):1995S-2027S.
- 600 2. Moll R, Davis B. Iron, vitamin B12 and folate. *Medicine.* 2017;45(4):198-203.
- 601 3. Fang H, Kang J, Zhang D. Microbial production of vitamin B12: a review and future  
602 perspectives. *Microbiol Cell Fact.* 2017;16(1):15.
- 603 4. Roth J, Lawrence J, Bobik T. Cobalamin (coenzyme B12): synthesis and biological significance.  
604 *Annual Review of Microbiology.* 1996;50(1):137-81. doi:10.1146/annurev.micro.50.1.137
- 605 5. Rodionov DA, Vitreschak AG, Mironov AA, Gelfand MS. Comparative genomics of the vitamin  
606 B12 metabolism and regulation in prokaryotes. *Journal of Biological Chemistry.* 2003;278(42):41148-  
607 59.



- 608 6. Gille D, Schmid A. Vitamin B12 in meat and dairy products. *Nutr Rev.* 2015;73(2):106-15.  
609 doi:10.1093/nutrit/nuu011
- 610 7. Institute of Medicine FaNB. Dietary reference intakes for thiamin, riboflavin, niacin, vitamin  
611 B(6), folate, vitamin B(12), pantothenic acid, biotin, and choline. Dietary reference intakes for  
612 thiamin, riboflavin, niacin, vitamin B(6), folate, vitamin B(12), pantothenic acid, biotin, and choline.  
613 Washington, DC: National Academies Press; 1998.
- 614 8. Ortigues-Marty I, Micol D, Prache S, Dozias D, Girard C, L. Nutritional value of meat: the  
615 influence of nutrition and physical activity on vitamin B12 concentrations in ruminant tissues.  
616 *Reprod Nutr Dev.* 2005;45(4):453-67.
- 617 9. Stabler SP, Allen RH. Vitamin B12 deficiency as a worldwide problem. *Annual Review of*  
618 *Nutrition.* 2004;24:299-326.
- 619 10. Watanabe F, Katsura H, Takenaka S, Enomoto T, Miyamoto E, Nakatsuka T, et al.  
620 Characterization of vitamin B12 compounds from edible shellfish, clam, oyster, and mussel.  
621 *International Journal of Food Sciences and Nutrition.* 2001;52(3):263-8.
- 622 11. Tanioka Y, Takenaka S, Furusho T, Yabuta Y, Nakano Y, Watanabe F. Identification of vitamin  
623 B12 and pseudovitamin B12 from various edible shellfish using liquid chromatography–electrospray  
624 ionization/tandem mass spectrometry. *Fish Sci.* 2014;80(5):1065-71.
- 625 12. Bito T, Tanioka Y, Watanabe F. Characterization of vitamin B12 compounds from marine  
626 foods. *Fish Sci.* 2018;84(5):747-55.
- 627 13. Yuasa M, Kawabeta K, Eguchi A, Abe H, Yamashita E, Koba K, et al. Characterization of taste  
628 and micronutrient content of rock oysters (*Crassostrea nippona*) and Pacific oysters (*Crassostrea*  
629 *gigas*) in Japan. *Int J Gastro Food Sci.* 2018;13:52-7.
- 630 14. Tandon P, Jin Q, Huang L. A promising approach to enhance microalgae productivity by  
631 exogenous supply of vitamins. *Microbiol Cell Fact.* 2017;16(1):219.
- 632 15. Croft MT, Lawrence AD, Raux-Deery E, Warren MJ, Smith AG. Algae acquire vitamin B12  
633 through a symbiotic relationship with bacteria. *Nature.* 2005;438(7064):90-3.
- 634 16. Kazamia E, Czesnick H, Nguyen TTV, Croft MT, Sherwood E, Sasso S, et al. Mutualistic  
635 interactions between vitamin B12-dependent algae and heterotrophic bacteria exhibit regulation.  
636 *Environmental Microbiology.* 2012;14(6):1466-76.
- 637 17. Wagner-Döbler I, Ballhausen B, Berger M, Brinkhoff T, Buchholz I, Bunk B, et al. The  
638 complete genome sequence of the algal symbiont *Dinoroseobacter shibae*: a hitchhiker's guide to life  
639 in the sea. *ISME J.* 2010;4(1):61-77.
- 640 18. Grant MA, Kazamia E, Cicuta P, Smith AG. Direct exchange of vitamin B12 is demonstrated by  
641 modelling the growth dynamics of algal–bacterial cocultures. *ISME J.* 2014;8(7):1418-27.
- 642 19. Croft MT, Warren MJ, Smith AG. Algae need their vitamins. *Eukaryotic Cell.* 2006;5(8):1175-  
643 83.
- 644 20. Segueineau C, Laschi-Loquerie A, Moal J, Samain JF. Vitamin requirements in great scallop  
645 larvae. *Aquaculture International.* 1996;4(4):315-24.
- 646 21. Brown M, Mular M, Miller I, Farmer C, Trenerry C. The vitamin content of microalgae used in  
647 aquaculture. *Journal of Applied Phycology.* 1999;11(3):247-55.
- 648 22. Pierce ML, Ward JE. Microbial ecology of the bivalvia, with an emphasis on the family  
649 ostreidae. *Journal of Shellfish Research.* 2018;37(4):793-806. doi:10.2983/035.037.0410
- 650 23. Panzeca C, Beck AJ, Tovar-Sanchez A, Segovia-Zavala J, Taylor GT, Gobler CJ, et al.  
651 Distributions of dissolved vitamin B12 and Co in coastal and open-ocean environments. *Estuar Coast*  
652 *Shelf Sci.* 2009;85(2):223-30. doi:<https://doi.org/10.1016/j.ecss.2009.08.016>
- 653 24. Okbamichael M, Sañudo-Wilhelmy SA. A new method for the determination of Vitamin B12  
654 in seawater. *Anal Chim Acta.* 2004;517(1-2):33-8.
- 655 25. Green R, Allen LH, Bjørke-Monsen A-L, Brito A, Guéant J-L, Miller JW, et al. Vitamin B12  
656 deficiency. *Nat Rev Dis Primers.* 2017;3(1):17040. doi:10.1038/nrdp.2017.40
- 657 26. Allen LH. How common is vitamin B-12 deficiency? *Am J Clin Nutr.* 2008;89(2):693S-6S.  
658 doi:10.3945/ajcn.2008.26947A



- 659 27. Allen LH. Causes of vitamin B12 and folate deficiency. *Food Nutr Bull*.  
660 2008;29(2\_suppl1):S20-S34. doi:10.1177/15648265080292s105
- 661 28. Fedosov SN. Physiological and molecular aspects of cobalamin transport. In: Stanger O,  
662 editor. *Water soluble vitamins: clinical research and future application*. Dordrecht: Springer  
663 Netherlands; 2012. p. 347-67.
- 664 29. Pawlak R, James PS, Raj S, Cullum-Dugan D, Lucus D. Understanding Vitamin B12. *Am J*  
665 *Lifestyle Med*. 2013;7(1):60-5. doi:10.1177/1559827612450688
- 666 30. Paul C, Brady DM. Comparative bioavailability and utilization of particular forms of B12  
667 supplements with potential to mitigate B12-related genetic polymorphisms. *Integr Med*.  
668 2017;16(1):42-9.
- 669 31. Maxwell B. The distribution of vitamin B12-active substances in some marine invertebrates  
670 of British Columbia. *J Fish Res Board Can*. 1952;9(3):164-8.
- 671 32. Provasoli L, Carlucci A. *Vitamins and growth regulators*. Bot Monogr. 1974.
- 672 33. Guillard RR. Culture of phytoplankton for feeding marine invertebrates. *Culture of Marine*  
673 *Invertebrate Animals*: Springer; 1975. p. 29-60.
- 674 34. Walne PR. Studies on the food value of nineteen genera of algae to juvenile bivalves of the  
675 genera *Ostrea*, *Crassostrea*, *Mercenaria* and *Mytilus*. *Fishery investigations, series 2*. 1970;26(5):1-  
676 62.
- 677 35. Vogeler S, Miller-Ezzy P, Li X, Wikfors GH, Joyce A. First report of a putative involvement of  
678 the NMDA pathway in Pacific oyster (*Crassostrea gigas*) development: effect of NMDA receptor  
679 ligands on oyster metamorphosis with implications for bivalve hatchery management. *Aquaculture*.  
680 2018;497:140-6.
- 681 36. Wilcox RR. *Understanding and applying basic statistical methods using R*: John Wiley & Sons;  
682 2016.
- 683 37. Jee P, Fernandez L, Perkins SL, Brooks SP. Effect of storage and repeated freeze/thaw on (S)  
684 vitamin B12. *Clin Biochem*. 2014;47(18):344. doi:<https://doi.org/10.1016/j.clinbiochem.2014.09.011>
- 685 38. Lauren L, Alison M B, Giacomo R D, Michael G J, Peter A L. Effect of flow rate and freezing on  
686 cyanocobalamin recovery using a commercial solid phase extraction cartridge. *Ann Mar Sci*. 2020.
- 687 39. Sahari M, Ahmadnia A, Barzegar M, Noorolahi Z. Vitamin losses during frozen storage of *Liza*  
688 *aurata* (Risso, 1810), *Cyprinus carpio* L. 1758, *Clupeonella cultriventris caspia* (Nordmann, 1840),  
689 *Rutilus frisii kutum* (Kamenskii, 1901) and *Sander lucioperca* (L., 1758). *Journal of Applied*  
690 *Ichthyology*. 2014;30(2):366-71.
- 691 40. Ueta K, Nishioka M, Yabuta Y, Watanabe F. TLC-bioautography analysis of vitamin B12  
692 compound from the short-necked clam (*Ruditapes philippinarum*) extract used as a flavoring. *Journal*  
693 *of Liquid Chromatography & Related Technologies*. 2010;33(7-8):972-9.  
694 doi:10.1080/10826071003769512
- 695 41. Ueta K, Ishihara Y, Yabuta Y, Masuda S, Watanabe F. TLC-analysis of a corrinoid compound  
696 from Japanese rock-oyster "Iwa-gaki" (*Crassostrea nippona*). *Journal of Liquid Chromatography &*  
697 *Related Technologies*. 2011;34(10-11):928-35.
- 698 42. Shiau S-Y, Lung C-Q. Estimation of the vitamin B12 requirement of the grass shrimp, *Penaeus*  
699 *monodon*. *Aquaculture*. 1993;117(1):157-63. doi:[https://doi.org/10.1016/0044-8486\(93\)90132-I](https://doi.org/10.1016/0044-8486(93)90132-I)
- 700 43. Teng F, Tanioka Y, Hamaguchi N, Bito T, Takenaka S, Yabuta Y, et al. Determination and  
701 characterization of vitamin B12 compounds in edible sea snails, ivory shell *Babylonia japonica* and  
702 turban shell *Turdo Batillus cornutus*. *Fish Sci*. 2015;81(6):1105-11. doi:10.1007/s12562-015-0920-5
- 703 44. Froese DS, Fowler B, Baumgartner MR. Vitamin B12, folate, and the methionine  
704 remethylation cycle—biochemistry, pathways, and regulation. *Journal of Inherited Metabolic*  
705 *Disease*. 2019;42(4):673-85. doi:<https://doi.org/10.1002/jimd.12009>
- 706 45. Calderón-Ospina CA, Nava-Mesa MO. B Vitamins in the nervous system: Current knowledge  
707 of the biochemical modes of action and synergies of thiamine, pyridoxine, and cobalamin. *CNS*  
708 *Neurosci Ther*. 2020;26(1):5-13. doi:10.1111/cns.13207

- 709 46. Koury MJ, Ponka P. New insights into erythropoiesis: the roles of folate, vitamin B12, and  
710 iron. Annual Review of Nutrition. 2004;24:105-31.
- 711 47. Wei J, Yu N, Tian W, Zhang F, Wu Q, Li E, et al. Dietary vitamin B12 requirement and its effect  
712 on non-specific immunity and disease resistance in juvenile Chinese mitten crab *Eriocheir sinensis*.  
713 Aquaculture. 2014;434:179-83.
- 714 48. Agarwal S, Dey S, Ghosh B, Biswas M, Dasgupta J. Mechanistic basis of vitamin B12 and  
715 cobinamide salvaging by the *Vibrio species*. Biochim Biophys Acta. 2019;1867(2):140-51.  
716 doi:<https://doi.org/10.1016/j.bbapap.2018.11.004>
- 717 49. Van De Lagemaat EE, De Groot LC, Van Den Heuvel EG. Vitamin B12 in relation to oxidative  
718 stress: a systematic review. Nutrients. 2019;11(2):482.
- 719 50. Mikkelsen K, Apostolopoulos V. Vitamin B12, folic acid, and the immune system. Nutrition  
720 and Immunity: Springer; 2019. p. 103-14.
- 721 51. Eichel J, González JC, Hotze M, Matthews RG, Schröder J. Vitamin-B12-independent  
722 methionine synthase from a higher plant (*Catharanthus Roseus*) molecular characterization,  
723 regulation, heterologous expression, and enzyme properties. European Journal of Biochemistry.  
724 1995;230(3):1053-8.
- 725 52. Keshavarz H, Moghadam RSG. Seed priming with cobalamin (vitamin B12) provides  
726 significant protection against salinity stress in the common bean. Rhizosphere. 2017;3:143-9.
- 727 53. Bito T, Teng F, Watanabe F. Bioactive compounds of edible purple laver *Porphyra* sp. (Nori).  
728 Journal of Agricultural and Food Chemistry. 2017;65(49):10685-92. doi:10.1021/acs.jafc.7b04688
- 729 54. Marie B, Joubert C, Belliard C, Tayale A, Zanella-Cléon I, Marin F, et al. Characterization of  
730 MRNP34, a novel methionine-rich nacre protein from the pearl oysters. Amino Acids.  
731 2012;42(5):2009-17.
- 732 55. Kintsu H, Nishimura R, Negishi L, Kuriyama I, Tsuchihashi Y, Zhu L, et al. Identification of  
733 methionine -rich insoluble proteins in the shell of the pearl oyster, *Pinctada fucata*. Sci Rep.  
734 2020;10(1):18335. doi:10.1038/s41598-020-75444-4
- 735 56. Suzuki M, Kubota K, Nishimura R, Negishi L, Komatsu K, Kagi H, et al. A unique methionine-  
736 rich protein–aragonite crystal complex: Structure and mechanical functions of the *Pinctada fucata*  
737 bivalve hinge ligament. Acta Biomater. 2019;100:1-9.  
738 doi:<https://doi.org/10.1016/j.actbio.2019.10.008>
- 739 57. Nef C, Jung S, Mairet F, Kaas R, Grizeau D, Garnier M. How haptophytes microalgae mitigate  
740 vitamin B12 limitation. Sci Rep. 2019;9(1):8417. doi:doi:10.1038/s41598-019-44797-w
- 741 58. Ellis KA, Cohen NR, Moreno C, Marchetti A. Cobalamin-independent methionine synthase  
742 distribution and influence on vitamin B12 growth requirements in marine diatoms. Protist.  
743 2017;168(1):32-47.
- 744 59. Helliwell KE, Lawrence AD, Holzer A, Kudahl UJ, Sasso S, Kräutler B, et al. Cyanobacteria and  
745 eukaryotic algae use different chemical variants of vitamin B12. Current Biology. 2016;26(8):999-  
746 1008.
- 747 60. Provasoli L, McLaughlin JJA, Droop MR. The development of artificial media for marine algae.  
748 Arch Mikrobiol. 1957;25(4):392-428.
- 749 61. Carlucci AF, Silbernagel SB. Effect of vitamin concentrations on growth and development of  
750 vitamin-requiring algae. Journal of Phycology. 1969;5(1):64-7.
- 751 62. Krichnavaruk S, Loataweesup W, Powtongsook S, Pavasant P. Optimal growth conditions and  
752 the cultivation of *Chaetoceros calcitrans* in airlift photobioreactor. Chem Eng J. 2005;105(3):91-8.
- 753 63. Ukeles R, Wikfors GH. Nutritional value of microalgae cultured in the absence of vitamins for  
754 growth of juvenile oysters, *Crassostrea virginica*. Journal of Shellfish Research. 1988;7:381-7.
- 755 64. Helm MM, Bourne N, Lovatelli A. Hatchery culture of bivalves. A practical manual 2004. 177p  
756 p.
- 757 65. Na H, Ponomarova O, Giese GE, Walhout AJ. *C. elegans* MRP-5 exports vitamin B12 from  
758 mother to offspring to support embryonic development. Cell Rep. 2018;22(12):3126-33.
- 759 66. Wilson H. Effects of maternal nutrition on hatchability. Poultry Science. 1997;76(1):134-43.

- 760 67. Seguineau C, Migaud H, Quere C, Moal J, Samain J-F. Changes in tissue concentrations of the  
761 vitamins B1 and B2 during reproductive cycle of bivalves: Part 2. The Pacific oyster *Crassostrea gigas*.  
762 Aquaculture. 2001;196(1-2):139-50.
- 763 68. Seguineau C, Saout C, Paulet Y-M, Muzellec M-L, Quéré C, Moal J, et al. Changes in tissue  
764 concentrations of the vitamins B1 and B2 during reproductive cycle of bivalves: Part 1: The scallop  
765 *Pecten maximus*. Aquaculture. 2001;196(1-2):125-37.
- 766 69. Stevick RJ, Sohn S, Modak TH, Nelson DR, Rowley DC, Tammi K, et al. Bacterial community  
767 dynamics in an oyster hatchery in response to probiotic treatment. Front Microbiol. 2019;10(1060).  
768 doi:10.3389/fmicb.2019.01060
- 769 70. Asmani K, Petton B, Le Grand J, Mounier J, Robert R, Nicolas J-L. Establishment of microbiota  
770 in larval culture of Pacific oyster, *Crassostrea gigas*. Aquaculture. 2016;464:434-44.
- 771 71. Watanabe F, Katsura H, Takenaka S, Fujita T, Abe K, Tamura Y, et al. Pseudovitamin B12 is  
772 the predominant cobamide of an algal health food, spirulina tablets. Journal of Agricultural and Food  
773 Chemistry. 1999;47(11):4736-41.
- 774 72. Miyamoto E, Tanioka Y, Nakao T, Barla F, Inui H, Fujita T, et al. Purification and  
775 characterization of a corrinoid-compound in an edible cyanobacterium *Aphanizomenon flos-aquae*  
776 as a nutritional supplementary food. Journal of Agricultural and Food Chemistry. 2006;54(25):9604-  
777 7.
- 778 73. Shelton AN, Seth EC, Mok KC, Han AW, Jackson SN, Haft DR, et al. Uneven distribution of  
779 cobamide biosynthesis and dependence in bacteria predicted by comparative genomics. ISME J.  
780 2018;13:789-804. doi:10.1038/s41396-018-0304-9
- 781 74. Doxey AC, Kurtz DA, Lynch MD, Sauder LA, Neufeld JD. Aquatic metagenomes implicate  
782 *Thaumarchaeota* in global cobalamin production. ISME J. 2015;9(2):461-71.
- 783 75. Heal KR, Qin W, Ribalet F, Bertagnolli AD, Coyote-Maestas W, Hmelo LR, et al. Two distinct  
784 pools of B12 analogs reveal community interdependencies in the ocean. Proceedings of the National  
785 Academy of Sciences of the United States of America. 2017;114(2):364-9.
- 786 76. Sañudo-Wilhelmy SA, Gómez-Consarnau L, Suffridge C, Webb EA. The role of B vitamins in  
787 marine biogeochemistry. Ann Rev Mar Sci. 2014;6:339-67.
- 788 77. Vitreschak AG, Rodionov DA, Mironov AA, Gelfand MS. Regulation of the vitamin B12  
789 metabolism and transport in bacteria by a conserved RNA structural element. RNA. 2003;9(9):1084-  
790 97. doi:10.1261/rna.5710303
- 791 78. Sugita H, Iwata M, Kato S, Sugiura C, Ueda R, Deguchi Y. Vitamin B12-producing ability of the  
792 gut microflora of marine gastropods. Aquacult Sci. 1991;39(4):363-9.
- 793 79. Laroche O, Symonds JE, Smith KF, Banks JC, Mae H, Bowman JP, et al. Understanding  
794 bacterial communities for informed biosecurity and improved larval survival in Pacific oysters.  
795 Aquaculture. 2018;497:164-73.
- 796 80. Vignier J, Laroche O, Rolton A, Wadsworth P, Kumanan K, Trochel B, et al. Dietary exposure  
797 of Pacific oyster (*Crassostrea gigas*) larvae to compromised microalgae results in impaired fitness  
798 and microbiome shift. Front Microbiol. 2021;12:706214.
- 799 81. Arfken A, Song B, Allen Jr SK, Carnegie RB. Comparing larval microbiomes of the eastern  
800 oyster (*Crassostrea virginica*) raised in different hatcheries. Aquaculture. 2021;531:735955.
- 801 82. Trabal Fernández N, Mazón-Suástegui JM, Vázquez-Juárez R, Ascencio-Valle F, Romero J.  
802 Changes in the composition and diversity of the bacterial microbiota associated with oysters  
803 (*Crassostrea corteziensis*, *Crassostrea gigas* and *Crassostrea sikamea*) during commercial production.  
804 FEMS Microbiol Ecol. 2014;88(1):69-83.
- 805 83. King GM, Judd C, Kuske CR, Smith C. Analysis of stomach and gut microbiomes of the eastern  
806 oyster (*Crassostrea virginica*) from coastal Louisiana, USA. PLoS One. 2012;7(12):e51475.
- 807 84. Llewellyn MS, Boutin S, Hoseinifar SH, Derome N. Teleost microbiomes: the state of the art  
808 in their characterization, manipulation and importance in aquaculture and fisheries. Front Microbiol.  
809 2014;5:207.

- 810 85. Hernández-Zárate G, Olmos-Soto J. Identification of bacterial diversity in the oyster  
811 *Crassostrea gigas* by fluorescent in situ hybridization and polymerase chain reaction. Journal of  
812 Applied Microbiology. 2006;100(4):664-72.
- 813 86. Wegner KM, Volkenborn N, Peter H, Eiler A. Disturbance induced decoupling between host  
814 genetics and composition of the associated microbiome. BMC Microbiol. 2013;13(1):1-12.
- 815 87. Roeselers G, Newton IL. On the evolutionary ecology of symbioses between chemosynthetic  
816 bacteria and bivalves. Applied Microbiology and Biotechnology. 2012;94(1):1-10.
- 817 88. Dubilier N, Bergin C, Lott C. Symbiotic diversity in marine animals: the art of harnessing  
818 chemosynthesis. Nat Rev Microbiol. 2008;6(10):725-40.
- 819 89. O'Connor RM, Fung JM, Sharp KH, Benner JS, McClung C, Cushing S, et al. Gill bacteria enable  
820 a novel digestive strategy in a wood-feeding mollusk. Proceedings of the National Academy of  
821 Sciences of the United States of America. 2014;111(47):E5096-E104. doi:10.1073/pnas.1413110111
- 822 90. Stravoravdis S, Shipway JR, Goodell B. How do shipworms eat wood? Screening shipworm  
823 gill symbiont genomes for lignin-modifying enzymes. Front Microbiol. 2021;12:665001.  
824 doi:10.3389/fmicb.2021.665001

825

A)

| Tissue                      | Female 1 | Female 2 | Female 3 | Male 1 | Male 2 | Male 3 |
|-----------------------------|----------|----------|----------|--------|--------|--------|
| <i>Crossostrea gigas</i>    |          |          |          |        |        |        |
| Mantle                      | 474      | 387      | 367      | 482    | 257    | 219    |
| Gills                       | 375      | 304      | 445      | na     | 407    | 303    |
| Digestive tract             | 143      | 133      | 97       | 190    | 76     | na     |
| Abductor muscle             | 619      | 302      | 703      | 967    | 405    | 440    |
| Genal (egg/sperm)           | 259      | 319      | 127      | 200    | 163    | na     |
| Total                       | 487      | 209      | 229      | na     | 266    | na     |
| <i>Pecten lamar</i>         |          |          |          |        |        |        |
| Abductor muscle             | 47       | 43       | 24       |        |        |        |
| Res (egg)                   | 118      | 92       | 76       |        |        |        |
| <i>Pectinaria deltoidea</i> |          |          |          |        |        |        |
| Foot                        | 618      |          |          |        |        |        |
| Digestive tract             | 675      |          |          |        |        |        |
| Abductor muscle             | 259      |          |          |        |        |        |
| Genal (egg)                 | 475      |          |          |        |        |        |
| Remaining parts             | 220      |          |          |        |        |        |
| Total                       | 1516     |          |          |        |        |        |

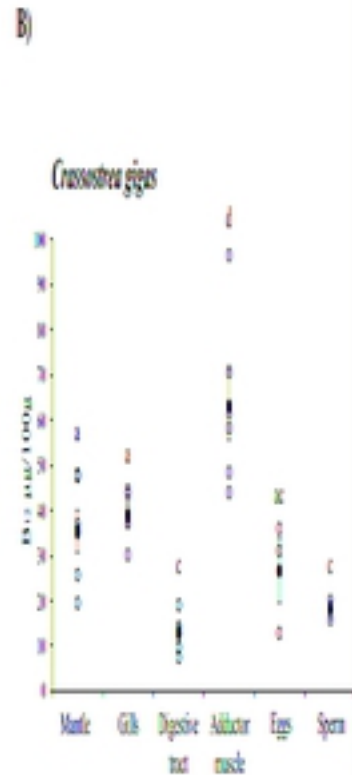

Figure 1

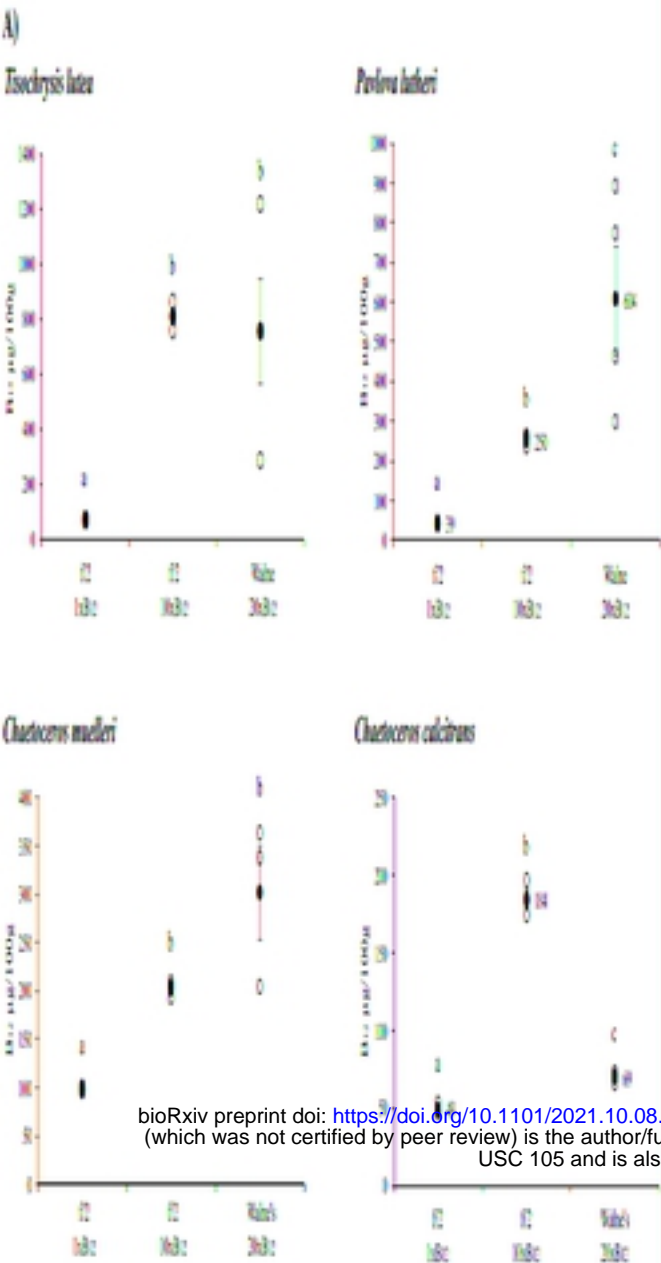

bioRxiv preprint doi: <https://doi.org/10.1101/2021.10.08.463633>; this version posted October 8, 2021. The copyright holder for this preprint (which was not certified by peer review) is the author/funder. This article is a US Government work. It is not subject to copyright under 17 USC 105 and is also made available for use under aCC0 license.

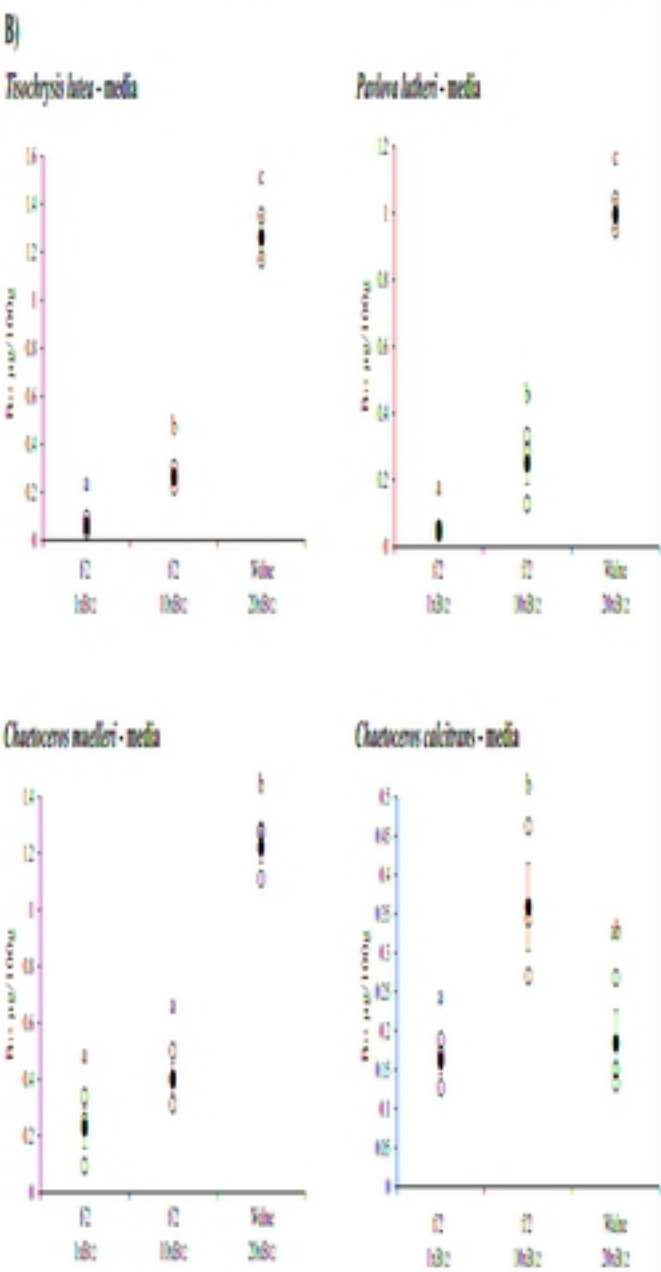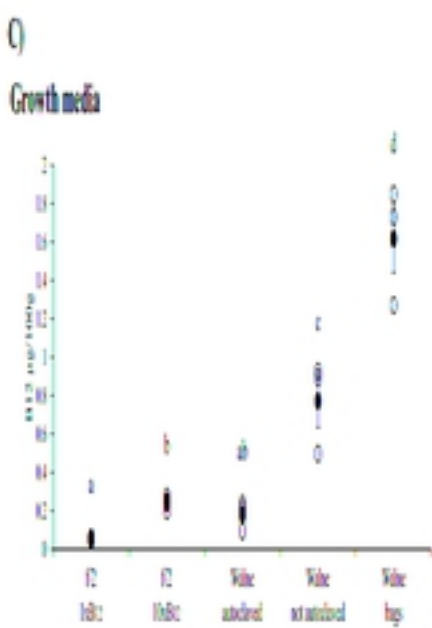

Figure 2



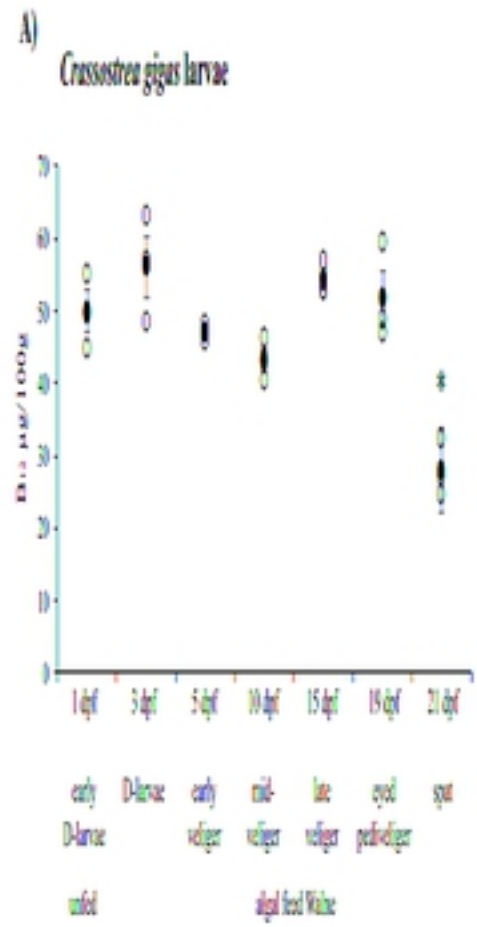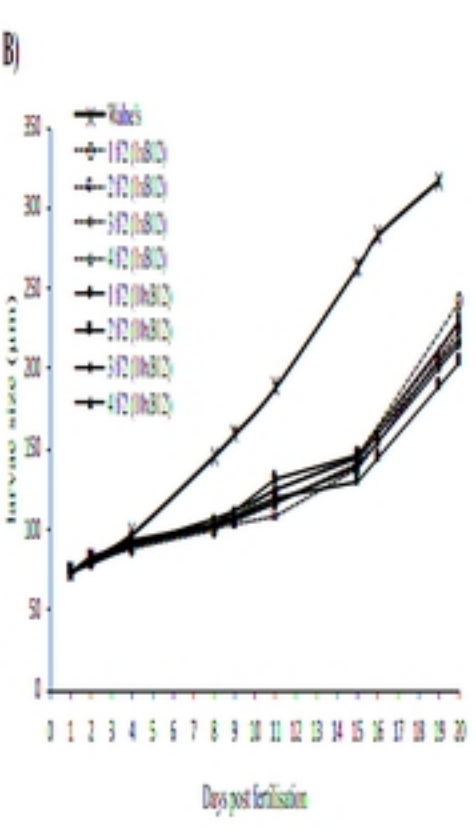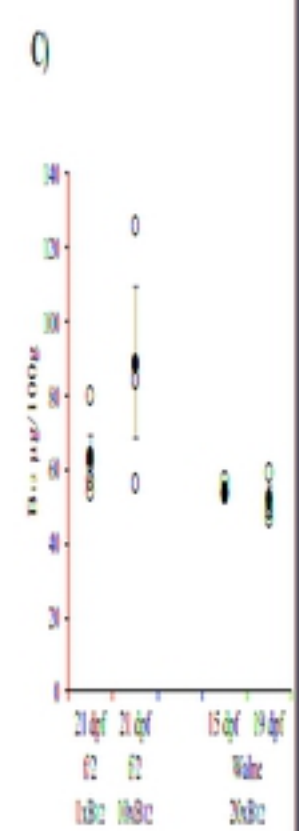

Figure 3
